# Supplementary material
Source: PubMed Central journal article supplement (PMC4024836)
Supplement: NIHMS510929-supplement-01.pdf [file NIHMS510929-supplement-01.pdf]

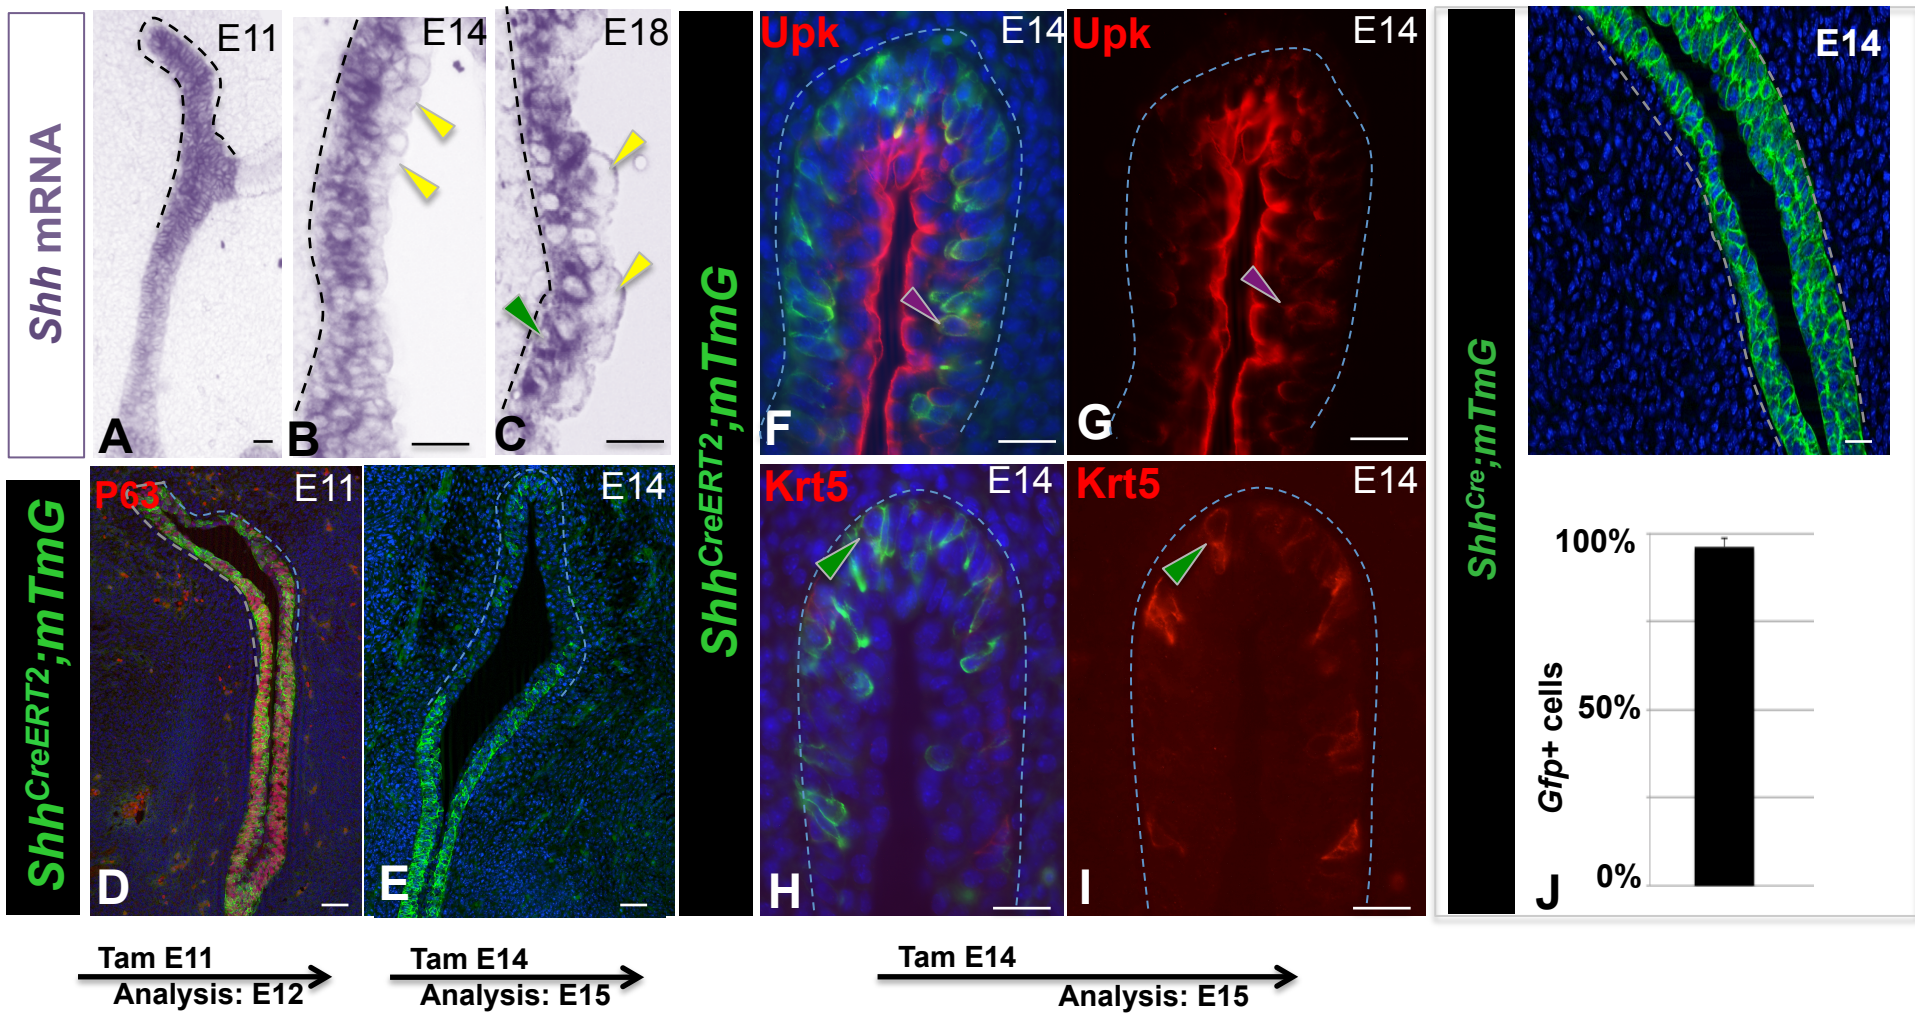

Supplementary Figure 1



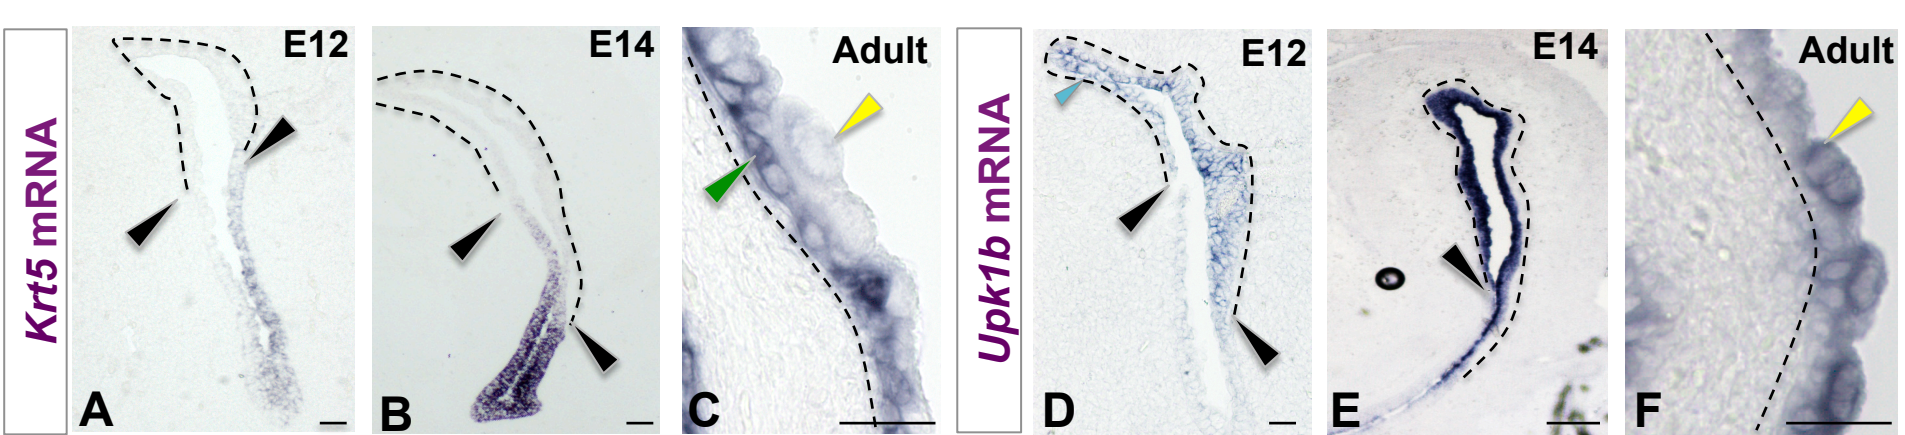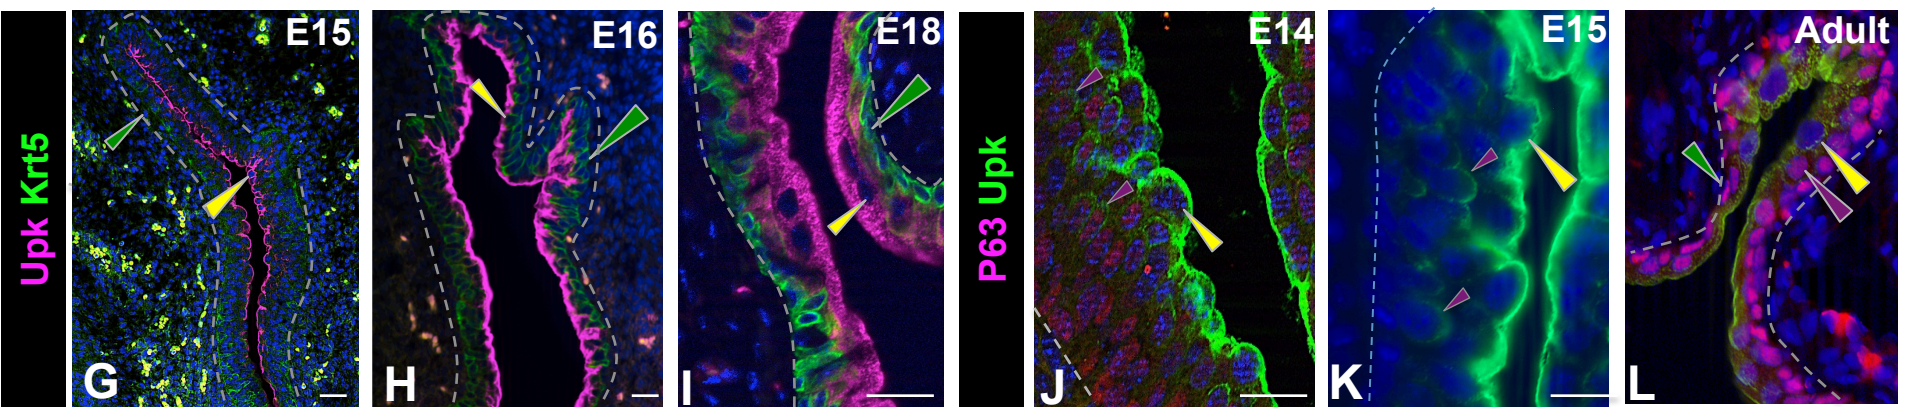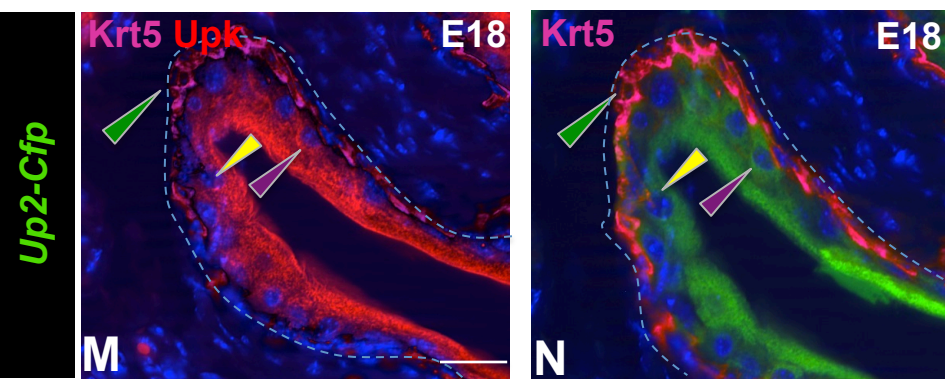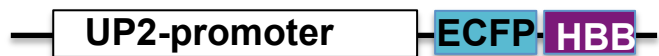

Supplementary Figure 2

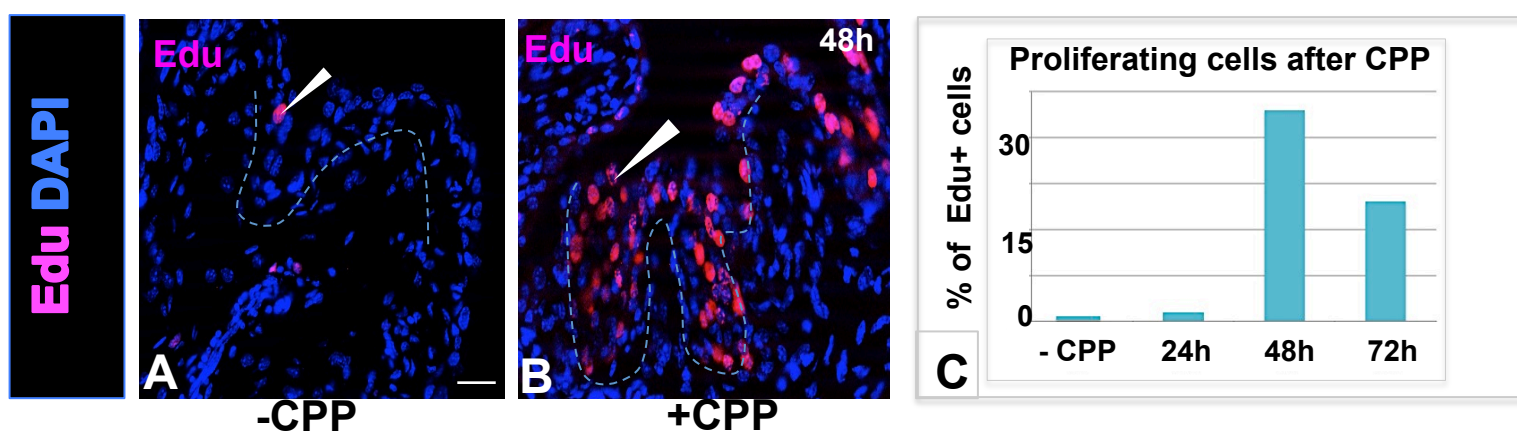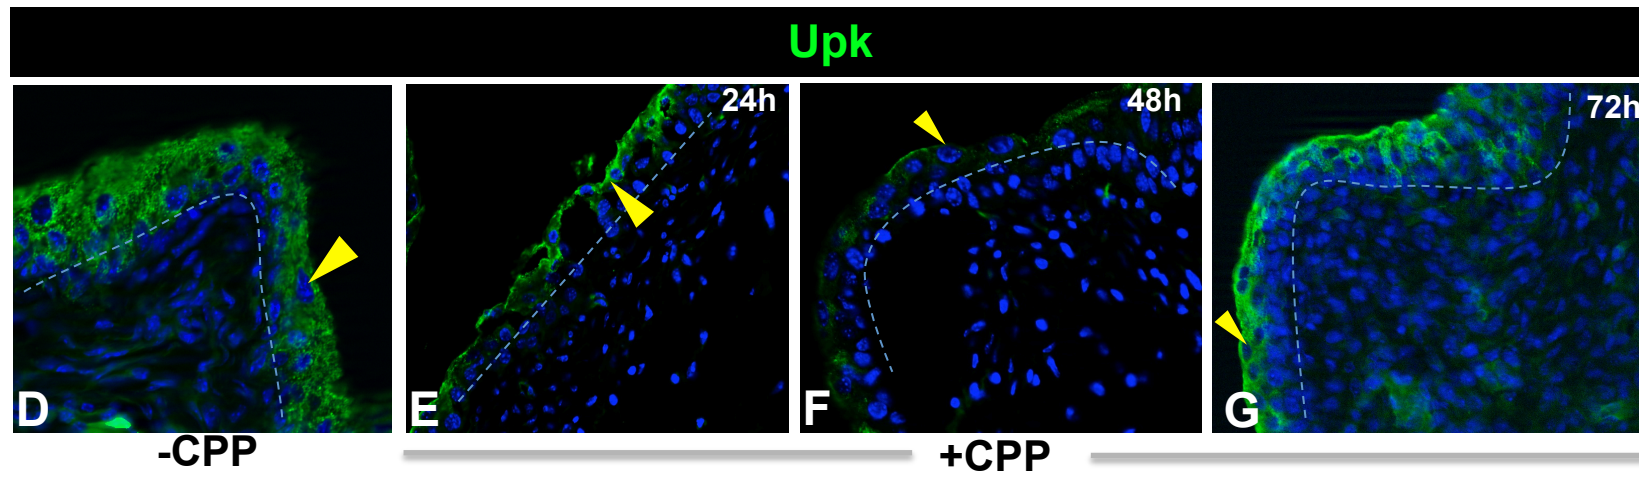



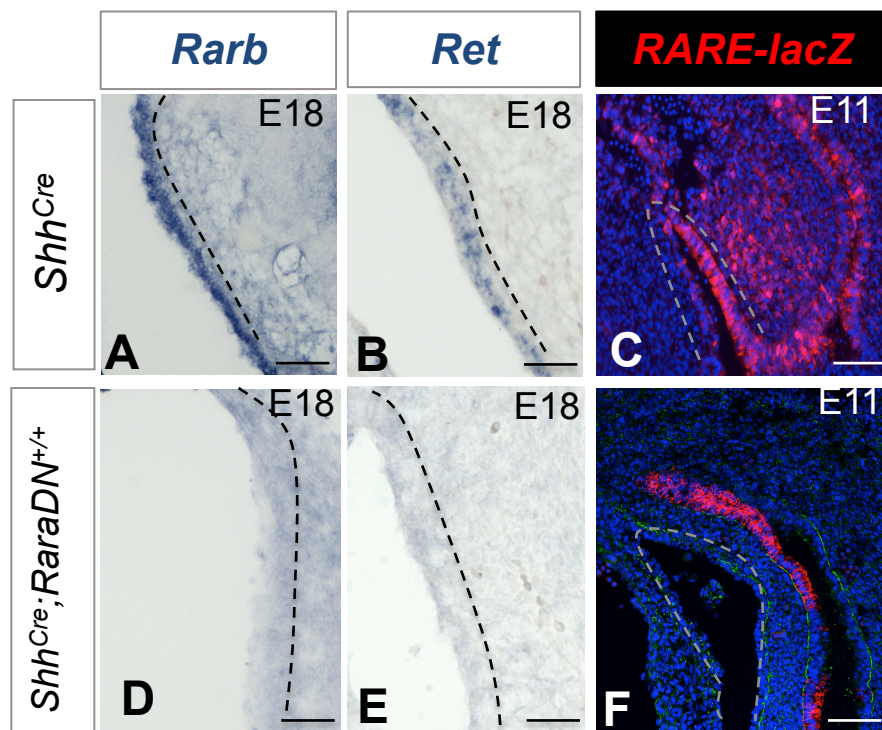



**Table S1. Phenotypes induced by expression of *Rara*DN phenocopy those in RA-deficiency and in mutants lacking components of the RA-signaling pathway.**

|                                                            | VAD<br>1-4 | RARKO<br>5-10 | Raldh2KO<br>9,11,12 | <b>RaraDN</b><br>11,12 | PPAR TR VDR<br>13-15 |
|------------------------------------------------------------|------------|---------------|---------------------|------------------------|----------------------|
| <b>Kidney</b>                                              |            |               |                     |                        |                      |
| Renal agenesis                                             | +          | +             | +                   | +                      | —                    |
| Renal hypoplasia                                           | +          | +             | +                   | +                      | —                    |
| Down-regulation of Ret                                     | +          | +             | +                   | +                      | —                    |
| <b>Ureter/Wolffian duct</b>                                |            |               |                     |                        |                      |
| Ectopic ureter insertion                                   | +          | +             | +                   | +                      | —                    |
| Ectopic vas deferens                                       | +          | +             | +                   | +                      | —                    |
| Hydronephrosis                                             | +          | +             | +                   | +                      | —                    |
| <b>Bladder/urethra</b>                                     |            |               |                     |                        |                      |
| Bladder hypoplasia                                         | +          | +             | +                   | +                      | —                    |
| Keratinization of the urogenital sinus and its derivatives | +          | +             | unknown             | +                      | —                    |

1. Wilson and Warkany. 1948; 2. Wolbach and Howe, 1925; 3. Liang, et al., 2005; 4. Quadro et al., 2005; 5. Lohnes et al., 1993; 6. Mendelsohn et al., 1994; 7. Batourina et al., 2001; 8. Batourina et al., 2002, 9. Batourina et al., 2005; 10. Luo et al., 1996; 11. Chia et al., 2011; 12. Rosselot et al., 2010; 13. Barak et al., 1999; 14. Panda et al., 2001; 15. Gothe et al., 1999.

## Legends-Supplementary Figures

**Supplementary Figure S1** (related to Figure 1). **Analysis of the specificity of Cre-dependent recombination in *Shh<sup>CreERT2</sup>;mTmG* embryos.** A-C. In situ analysis showing expression of *Shh* mRNA at E11 (A), E14 (B) and E18 (C). D. P63 expression in a section from an E12 *Shh<sup>CreERT2</sup>;mTmG* embryo exposed to TM on E11. E A section from an E15 *Shh<sup>CreERT2</sup>;mTmG* embryo exposed to TM on E14. F. Upk expression in a sectioned urothelium from an E15 *Shh<sup>CreERT2</sup>;mTmG* embryo exposed to TM on E14. G. Same section as in F., showing only the Red channel (Upk-expression). H. Krt5-expression in an E15 *Shh<sup>CreERT2</sup>;mTmG* embryo exposed to TM on E14. For quantification, a minimum of three independent experiments were performed, and the average  $\pm$  SEM was plotted.

**Magnifications :** A,B 10X; C 40X; D,E 20X; F-I 40X; scale bars 50 $\mu$ m.

**Supplementary Figure S2** (related to Figure 2). **Marker analysis of the developing urothelium.** A-C. In situ hybridization analysis showing Krt5 expression in an E12 embryo (A), an E14 embryo (B), and in an adult (C). D-F. In situ hybridization analysis showing expression of Upk1b in an E12 embryo (D), an E14 embryo (E), and in an adult (F). G-I. Sections of E15 (G), E16 (H) and E18 (I) embryos co-stained for expression of Upk and Krt5. J. Upk and P63 expression in a section from an E14 embryonic urothelium. K. Upk expression in a section from an E15 embryonic urothelium. L. Upk and P63 stained section from an adult urothelium. M-N. Specificity of *Cfp* expression in *Up2-Cfp* transgenic mice. M. Upk and Krt5 expression in an E18 **Up2-Cfp** embryo (shown without the green channel). N. *Up2-Cfp* expression in a serial section from the same embryo as in (M) co-stained with Krt5. **Magnifications:** A,B, G,H 10X; C 40X; J,K, 40X; I, M,L 20X scale bars 50 $\mu$ m;

**Supplementary Figure 3.** (related to Figure 3). **The CPP-induced damage and repair model.**

A. Edu labeling (pink) in a wild type adult not treated with CPP. B. Edu-labeled cells (pink) in an adult 48h after CPP administration. C. A chart showing the proportion of proliferating cells in the urothelium of untreated and CPP-treated adults. D. Upk expression (green) in the urothelium of an untreated wild type adult. E. Upk expression (green) 24h after CPP treatment. F. Upk expression (green) 48h after CPP treatment. G. Upk expression (green) 72h after CPP treatment. **Magnifications:** A,B,H,I 20X; D-G 40X. Scale bars 50 $\mu$ m.



**Supplementary Figure 4.** (related to Figure 7). **RA-signaling is down-regulated in the urothelium of *Shh<sup>Cre</sup>;RaraDN* mutants.** A. In situ hybridization analysis showing *Rarb* expression in the urothelium of an E18 *Shh<sup>Cre/+</sup>* control embryo. B. In situ hybridization analysis showing *Ret* expression in the urothelium of an E18 *Shh<sup>Cre/+</sup>* control embryo. C. RARE-lacZ activity in the urothelium of an *Shh<sup>Cre/+</sup>;RARE-lacZ* E11 control embryo. D. In situ hybridization analysis showing lack of *Rarb* expression in the urothelium of an E18 *Shh<sup>Cre</sup>;RaraDN* mutant. E. In situ hybridization analysis showing lack of *Ret* expression in the urothelium of an E18 *Shh<sup>Cre</sup>;RaraDN* mutant. F. Down-regulated RA-reporter activity in the urothelium of an E11 *Shh<sup>Cre</sup>;RaraDN;RARE-lacZ* mutant embryo. **Magnifications:** A-F 10X scale bars 50µm

**Supplementary Table 1. Expression of the RaraDN generates defects that phenocopy those in RA deficiency.** Comparison of urinary tract phenotypes induced by dietary Vitamin-A deficiency, deletion of RA receptors and Raldh2 knockouts with those in mice expressing RaraDN driven by different cell-type-specific Cre lines compared to phenotypes observed in mutant lacking other nuclear receptor family members (PPAR, VDR and TR) that bind Rxr.

## EXPERIMENTAL PROCEDURES

**Mice used in this study and primers used for genotyping.** Genotyping was done by PCR of the tail or yolk sac DNA using a DNA Thermal Cycler PTC-100 (BIO-RAD, Hercules, CA, USA) with 40 cycles of 94C for 30 seconds, 53.5C for 30 seconds and 72C for 40 seconds, except for *RaraDN*, where we performed 45 cycles of 94C for 30 seconds, 54.5C for 30 seconds and 72C for 40 seconds.

**Primers:** *RARE-LacZ* mice were genotyped using primers 5'-CGTCGTCCTCAAACCTGGCAGATGC-3' (forward) and 5'-TTCGGCGCTCCACAGTTTCGGGTTTTTC-3' (reverse) generating a 570 bp product. Primers for genotyping *RaraDN* mice were 5'-ATGGTGTACACGTGTCACC-3' (mutated forward), 5'-CACCTTCTCAATGAGCTCC-3' (mutated reverse), 5'-TGGCTCGTGTCAAAGAACTG-3' (wild-type forward) and 5'-TGGTCGGTAGAAAGGCAGAG-3' (wild-type reverse) to generate a 210 bp mutant and a 426 bp wild type bands. *Shh<sup>Cre</sup>* and *Shh<sup>CreERT2</sup>* mice genotyped using the following primers: 5'-AGGTGGACCTGATCATGGAG-3' (forward) and 5'-ATACCGGAGATCATGCAAGC-3' (reverse) generating a 440 bp product. *Krt5<sup>CreERT2</sup>* mice were genotyped using primers 5'-ATTTGCCTGCATTACCGGTC-3' (forward) and 5'-ATCAACGTTTTGTTTTCGGA-3' (reverse) generating a 350 bp product. For genotyping *Upk2-CFP* mice we used primers 5'-CACTCCGAGACAAAATCAGCTACC-3' and 5'-CGTCGTCCTTGAAGAAGATGGT-3' generating a 450 bp product. Primers for *Gt(ROSA)26Sortm4(ACTB-tdTomato,-EGFP)Luo/J* reporter were 5'-CTCTGCTGCCTCCTGGCTTCT-3' (forward) and 5'-TCAATGGGCGGGGGTCGTT-3' (reverse) generating a 250 bp product.

| Allele                                                  | Name in text   | Source                                     | Ref                  |
|---------------------------------------------------------|----------------|--------------------------------------------|----------------------|
| <i>B6;129S6-Gt(Rosa)26Sor<sup>tm2(mCherry)Mgn</sup></i> | <i>mCherry</i> | MMRC<br>(stock # 036286-UCD)               | (Chen et al., 2011)  |
| <i>Upk2-Cfp</i>                                         | <i>Up2-Cfp</i> | Mendelsohn lab,<br>Columbia University, NY | (this study)         |
| <i>Shhtm1(EGFP/cre)Cjt/J</i>                            | <i>ShhCre</i>  | Jackson Laboratory<br>(stock #005623)      | (Harfe et al., 2004) |



|                                                        |                                 |                                         |                                                 |
|--------------------------------------------------------|---------------------------------|-----------------------------------------|-------------------------------------------------|
| Shhtm2(cre/ESR1)Cjt/J                                  | <i>Shh</i> <sup>CreERT2</sup>   | Jackson Laboratory<br>(stock #005623)   | (Harfe et al., 2004)                            |
| <i>Krt5</i> <sup>CreERT2</sup>                         | <i>K5</i> <sup>CreERT2</sup>    | Daniel Metzger, IGBMC,<br>France        | (Indra et al., 1999)                            |
| <i>Rare-hsp68-lacZ</i>                                 | <i>RARE-lacZ</i>                | Dr. Janet Rossant,                      | (Rossant et al.,<br>1991)                       |
| <i>Gt(ROSA)RARa403</i>                                 | <i>RaraDN</i>                   | Mendelsohn lab,<br>Columbia University, | (Rosselot et al.,<br>2010)                      |
| <i>CMV/b-act-LoxP-Egfp-<br/>LoxP/nlsLacZ</i>           | T83-lacZ                        | Metzger Lab, IGBMC,<br>France           | Unpublished                                     |
| <i>Tg(Upk3a-<br/>GFP/cre/ERT2)26Amc/J</i>              | <i>UPK3aGCE</i>                 | McMahon Lab, Harvard<br>University      | www.GUDMAP.org                                  |
| <i>Foxa2</i> <sup>CreERT2</sup>                        | <i>Foxa2</i> <sup>CreERT2</sup> | Jackson Laboratory<br>(stock #008464)   | (Frank et al., 2007)                            |
| <i>Gt(ROSA)26Sortm4(ACTB-<br/>tdTomato,-EGFP)Luo/J</i> | <i>R26mGmT</i>                  | Jackson Laboratory<br>(stock #007576)   | (Luo et al., 1996;<br>Muzumdar et al.,<br>2007) |

| <b>PRIMARY ANTIBODIES USED IN THIS STUDY</b> |                                |                |                 |                           |
|----------------------------------------------|--------------------------------|----------------|-----------------|---------------------------|
| <b>Antigen</b>                               | <b>Supplier</b>                | <b>Ig Type</b> | <b>Dilution</b> | <b>Method</b>             |
| Trp63                                        | Santa Cruz<br>(4A4): sc-8431   | Mouse IgG      | 1:100           | Paraffin                  |
| TRp63                                        | Santa Cruz<br>(H-137): sc-8343 | Rabbit IgG     | 1:100           | Cryosections              |
| Keratin 5                                    | Covance (AF<br>138): PRB-160P  | Rabbit IgG     | 1:200           | Paraffin,<br>Cryosections |
| Pan Uroplakin                                | Dr. T. T. Sun<br>NYU           | Rabbit IgG     | 1:1000          | Paraffin,<br>Cryosections |
| LacZ                                         | Biogenesis<br>4600-1409        | Goat IgG       | 1:100           | Paraffin,<br>Cryosections |

|                                    |                                           |            |        |                          |
|------------------------------------|-------------------------------------------|------------|--------|--------------------------|
| Click-it EdU Alexa Fluor Azide Kit | Invitrogen<br>E10415                      |            |        | Paraffin                 |
| Cfp/Gfp                            | Rockland<br>(600-101-215)                 | Goat IgG   | 1:100  | Paraffin<br>Cryosections |
| Foxa2                              | Seven Hills<br>Bioreagents<br>(WRAB-1200) | Rabbit IgG | 1:1000 | Paraffin                 |

### SECONDARY ANTIBODIES USED IN THIS STUDY

|                                   |                           |           |        |                          |
|-----------------------------------|---------------------------|-----------|--------|--------------------------|
| Alexafluor 488 donkey anti-goat   | Invitrogen                | IgG (H+L) | 1:1000 | Paraffin,<br>Cryosection |
| Alexafluor 488 donkey anti-rabbit | Invitrogen                | IgG (H+L) | 1:1000 | Paraffin,<br>Cryosection |
| Alexafluor 594 donkey anti-rabbit | Invitrogen                | IgG (H+L) | 1:1000 | Paraffin,<br>Cryosection |
| Alexafluor 594 donkey anti-mouse  | Invitrogen                | IgG (H+L) | 1:1000 | Paraffin,<br>Cryosection |
| Alexafluor 488 goat anti-mouse    | Invitrogen                | IgG (H+L) | 1:1000 | Paraffin,<br>Cryosection |
| Alexafluor 594 donkey anti-rat    | Invitrogen                | IgG (H+L) | 1:1000 | Paraffin,<br>Cryosection |
| Alexafluor 594 donkey anti-goat   | Invitrogen                | IgG (H+L) | 1:1000 | Paraffin,<br>Cryosection |
| Cy5-conjugated donkey anti-mouse  | Jackson<br>ImmunoResearch | IgG (H+L) | 1:500  | Paraffin,<br>Cryosection |
| Cy5-conjugated donkey anti-goat   | Jackson<br>ImmunoResearch | IgG (H+L) | 1:500  | Paraffin,<br>Cryosection |
| Cy5-conjugated donkey anti-rabbit | Jackson<br>ImmunoResearch | IgG (H+L) | 1:500  | Paraffin,<br>Cryosection |



## LITERATURE CITED

- Barak, Y., Nelson, M.C., Ong, E.S., Jones, Y.Z., Ruiz-Lozano, P., Chien, K.R., Koder, A., and Evans, R.M. (1999). PPAR gamma is required for placental, cardiac, and adipose tissue development. *Mol Cell* 4, 585-595.
- Batourina, E., Choi, C., Paragas, N., Bello, N., Hensle, T., Costantini, F.D., Schuchardt, A., Bacallao, R.L., and Mendelsohn, C.L. (2002). Distal ureter morphogenesis depends on epithelial cell remodeling mediated by vitamin A and Ret. *Nat Genet* 32, 109-115.
- Batourina, E., Gim, S., Bello, N., Shy, M., Clagett-Dame, M., Srinivas, S., Costantini, F., and Mendelsohn, C. (2001). Vitamin A controls epithelial/mesenchymal interactions through Ret expression. *Nat Genet* 27, 74-78.
- Batourina, E., Tsai, S., Lambert, S., Sprenkle, P., Viana, R., Dutta, S., Hensle, T., Wang, F., Niederreither, K., McMahon, A.P., *et al.* (2005). Apoptosis induced by vitamin A signaling is crucial for connecting the ureters to the bladder. *Nat Genet* 37, 1082-1089.
- Chen, S.X., Osipovich, A.B., Ustione, A., Potter, L.A., Hipkens, S., Gangula, R., Yuan, W., Piston, D.W., and Magnuson, M.A. (2011). Quantification of factors influencing fluorescent protein expression using RMCE to generate an allelic series in the ROSA26 locus in mice. *Disease models & mechanisms* 4, 537-547.
- Chia, I., Grote, D., Marcotte, M., Batourina, E., Mendelsohn, C., and Bouchard, M. (2011). Nephric duct insertion is a crucial step in urinary tract maturation that is regulated by a Gata3-Raldh2-Ret molecular network in mice. *Development* 138, 2089-2097.
- Frank, D.U., Elliott, S.A., Park, E.J., Hammond, J., Saijoh, Y., and Moon, A.M. (2007). System for inducible expression of cre-recombinase from the Foxa2 locus in endoderm, notochord, and floor plate. *Developmental dynamics : an official publication of the American Association of Anatomists* 236, 1085-1092.
- Gothe, S., Wang, Z., Ng, L., Kindblom, J.M., Barros, A.C., Ohlsson, C., Vennstrom, B., and Forrest, D. (1999). Mice devoid of all known thyroid hormone receptors are viable but exhibit disorders of the pituitary-thyroid axis, growth, and bone maturation. *Genes Dev* 13, 1329-1341.
- Harfe, B.D., Scherz, P.J., Nissim, S., Tian, H., McMahon, A.P., and Tabin, C.J. (2004). Evidence for an expansion-based temporal Shh gradient in specifying vertebrate digit identities. *Cell* 118, 517-528.
- Indra, A.K., Warot, X., Brocard, J., Bornert, J.M., Xiao, J.H., Chambon, P., and Metzger, D. (1999). Temporally-controlled site-specific mutagenesis in the basal layer of the epidermis: comparison of the recombinase activity of the tamoxifen- inducible Cre-ER(T) and Cre-ER(T2) recombinases. *Nucleic Acids Res* 27, 4324-4327.
- Liang, F.X., Bosland, M.C., Huang, H., Romih, R., Baptiste, S., Deng, F.M., Wu, X.R., Shapiro, E., and Sun, T.T. (2005). Cellular basis of urothelial squamous metaplasia: roles of lineage heterogeneity and cell replacement. *J Cell Biol* 171, 835-844.

- Lohnes, D., Kastner, P., Dierich, A., Mark, M., LeMeur, M., and Chambon, P. (1993). Function of retinoic acid receptor gamma in the mouse. *Cell* 73, 643-658.
- Luo, J., Sucov, H.M., Bader, J.A., Evans, R.M., and Giguere, V. (1996). Compound mutants for retinoic acid receptor (RAR) beta and RAR alpha 1 reveal developmental functions for multiple RAR beta isoforms. *Mech Dev* 55, 33-44.
- Mendelsohn, C., Lohnes, D., Decimo, D., Lufkin, T., LeMeur, M., Chambon, P., and Mark, M. (1994). Function of the retinoic acid receptors (RARs) during development (II). Multiple abnormalities at various stages of organogenesis in RAR double mutants. *Development* 120, 2749-2771.
- Muzumdar, M.D., Tasic, B., Miyamichi, K., Li, L., and Luo, L. (2007). A global double-fluorescent Cre reporter mouse. *Genesis* 45, 593-605.
- Panda, D.K., Miao, D., Tremblay, M.L., Sirois, J., Farookhi, R., Hendy, G.N., and Goltzman, D. (2001). Targeted ablation of the 25-hydroxyvitamin D 1alpha -hydroxylase enzyme: evidence for skeletal, reproductive, and immune dysfunction. *Proc Natl Acad Sci U S A* 98, 7498-7503.
- Quadro, L., Hamberger, L., Gottesman, M.E., Wang, F., Colantuoni, V., Blaner, W.S., and Mendelsohn, C.L. (2005). Pathways of vitamin A delivery to the embryo: insights from a new tunable model of embryonic vitamin A deficiency. *Endocrinology* 146, 4479-4490.
- Rossant, J., Zirngibl, R., Cado, D., Shago, M., and Giguere, V. (1991). Expression of a retinoic acid response element-hsplacZ transgene defines specific domains of transcriptional activity during mouse embryogenesis. *Genes Dev* 5, 1333-1344.
- Rosselot, C., Spraggon, L., Chia, I., Batourina, E., Riccio, P., Lu, B., Niederreither, K., Dolle, P., Duester, G., Chambon, P., *et al.* (2010). Non-cell-autonomous retinoid signaling is crucial for renal development. *Development* 137, 283-292.
- Wilson, J.G., and Warkany, J. (1948). Malformations in the genito-urinary tract induced by maternal vitamin A deficiency in the rat. *Am J Anat* 83, 357-407.
- Wolbach, S.B., and Howe, P.R. (1925). Tissue changes following deprivation of fat-soluble A vitamin. *J Exp Med* 42, 753-777.
